# Supplementary material for: In situsynthesis of ultrafine metallic MoO2/carbon nitride nanosheets for efficient photocatalytic hydrogen generation: a prominent cocatalytic effect
Source: Royal Society of Chemistry journal article supplement (doi:10.1039/d0cy00421a), 2020-01-01
Supplement: d0cy00421a1.pdf [file d0cy00421a1.pdf]

## Supporting Information

### ***In situ* synthesis of ultrafine metallic MoO<sub>2</sub>/carbon nitride nanosheets for efficient photocatalytic hydrogen generation: Prominent cocatalytic effect**

Xiao-He Liu, Yun-Xiao Yin, Fan Du, Ji-Rui Bai, Bing Luo, Cheng Cheng, Qing-Yun Chen\*, Chi He\*

*International Research Center for Renewable Energy, State Key Laboratory of Multiphase Flow in Power Engineering, Xi'an Jiaotong University, Xi'an 710049, Shaanxi, P.R. China*

\*Corresponding authors:

Prof. Qing-Yun Chen

Tel./Fax: 86 29 82665110

E-mail: qychen@mail.xjtu.edu.cn

Prof. Chi He

Tel./Fax: 86 29 82663857

E-mail: chi\_he@xjtu.edu.cn

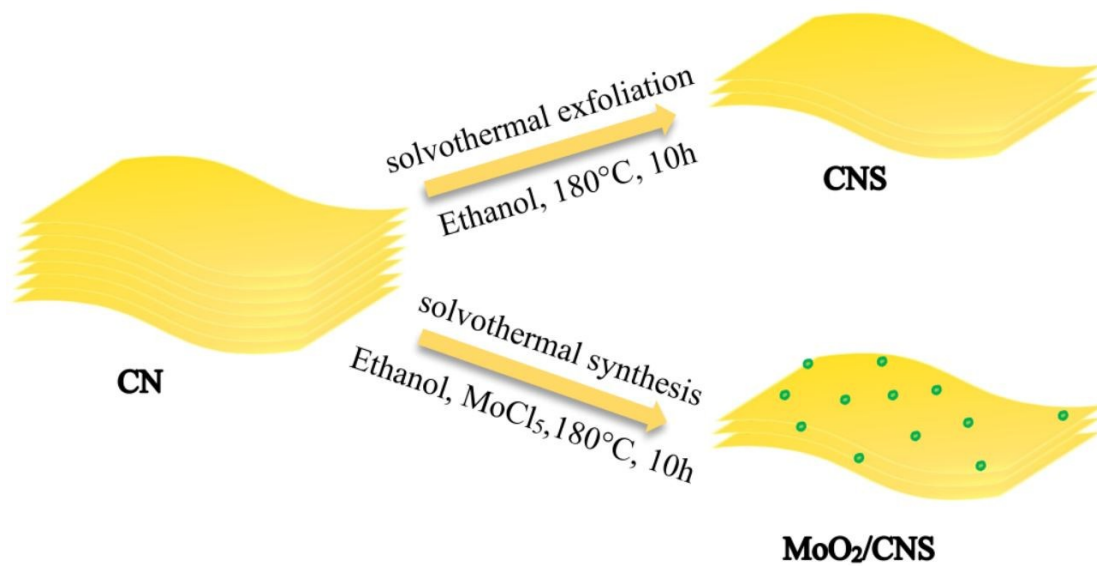

Fig. S1 Schematic illustration of CNS and MoO<sub>2</sub>/CN preparation procedures.

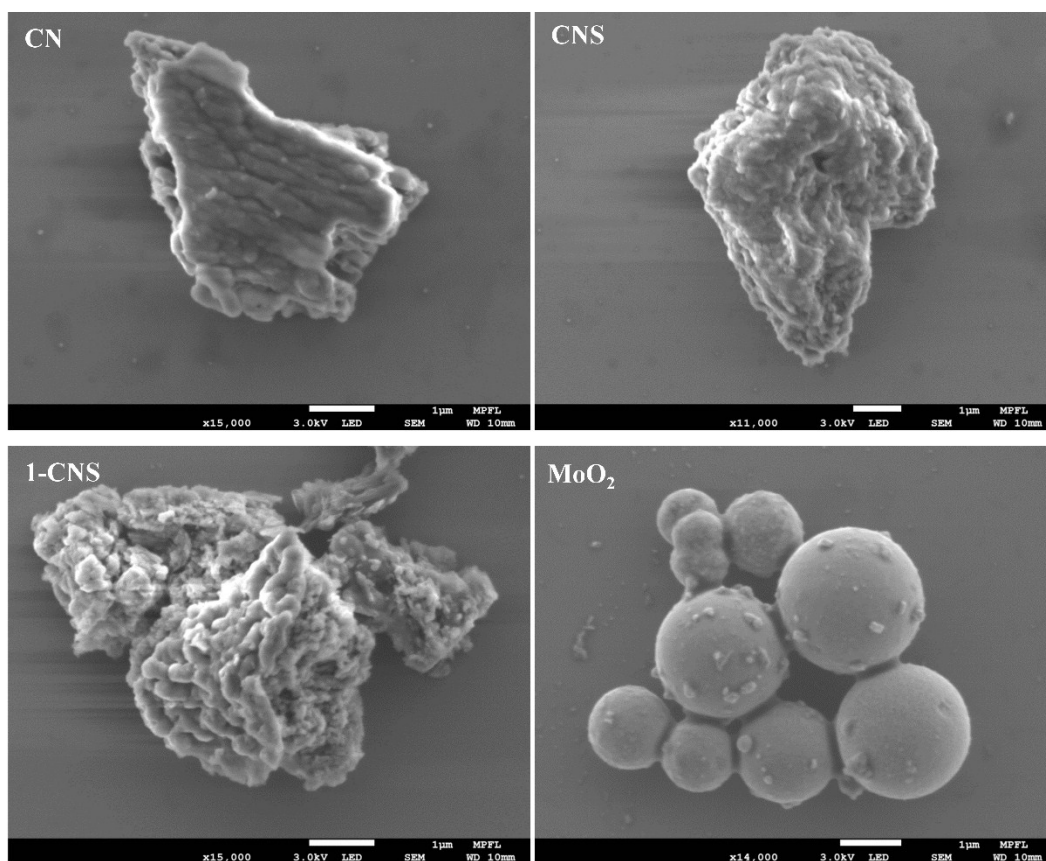

Fig. S2 SEM images of CN, CNS, 1-CNS and MoO<sub>2</sub>.

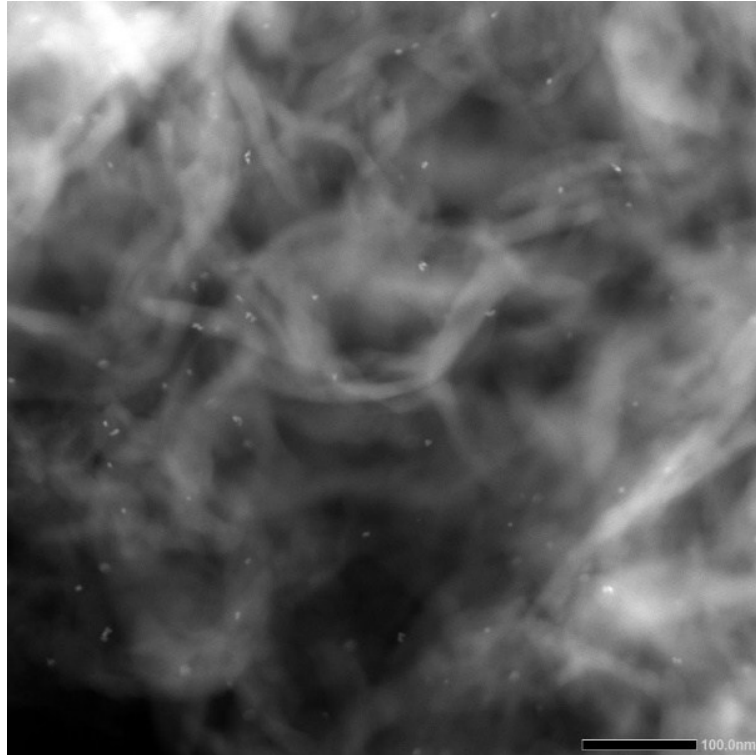

Fig. S3 STEM image of 1-CNS with large scale.

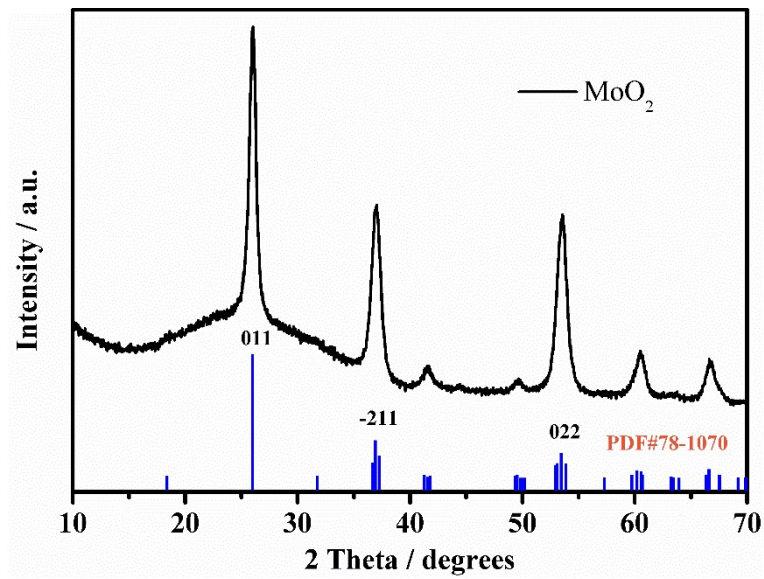

Fig. S4 XRD pattern of pure MoO<sub>2</sub>.

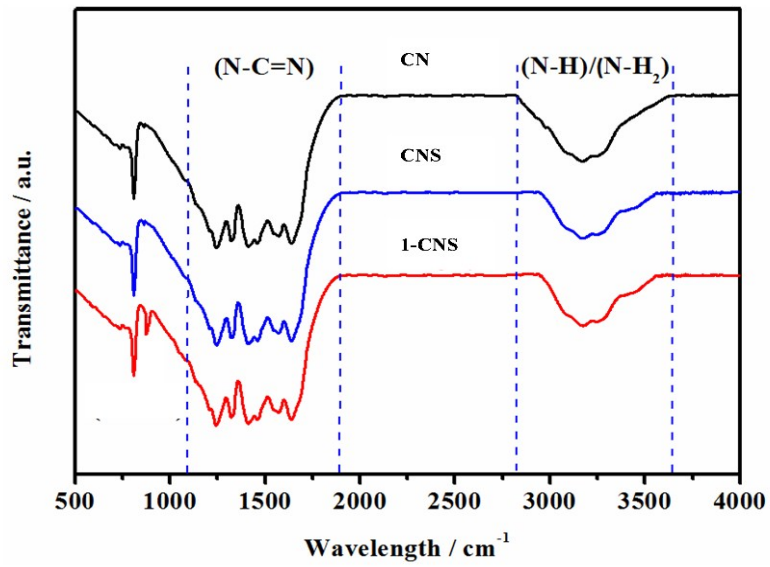

Fig. S5 FITR spectra of CN, CNS and 1-CNS.

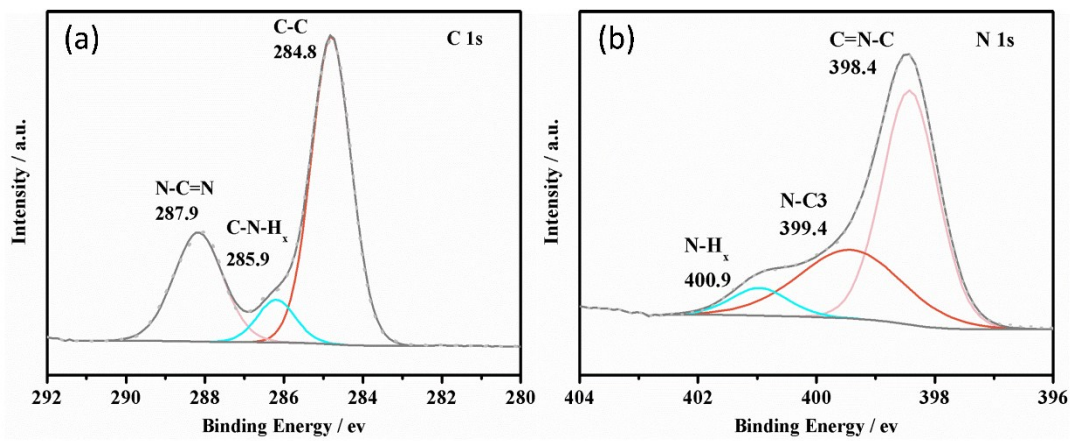

Fig. S6 XPS spectra of C 1s and N 1s of CNS.

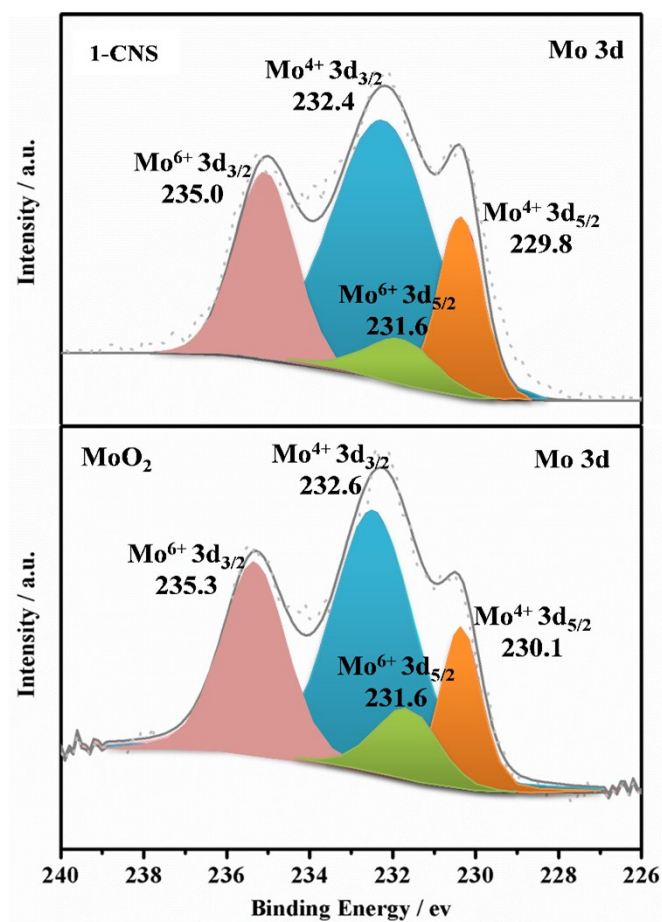

Fig. S7 XPS spectra of Mo 3d of 1-CNS and MoO<sub>2</sub>.

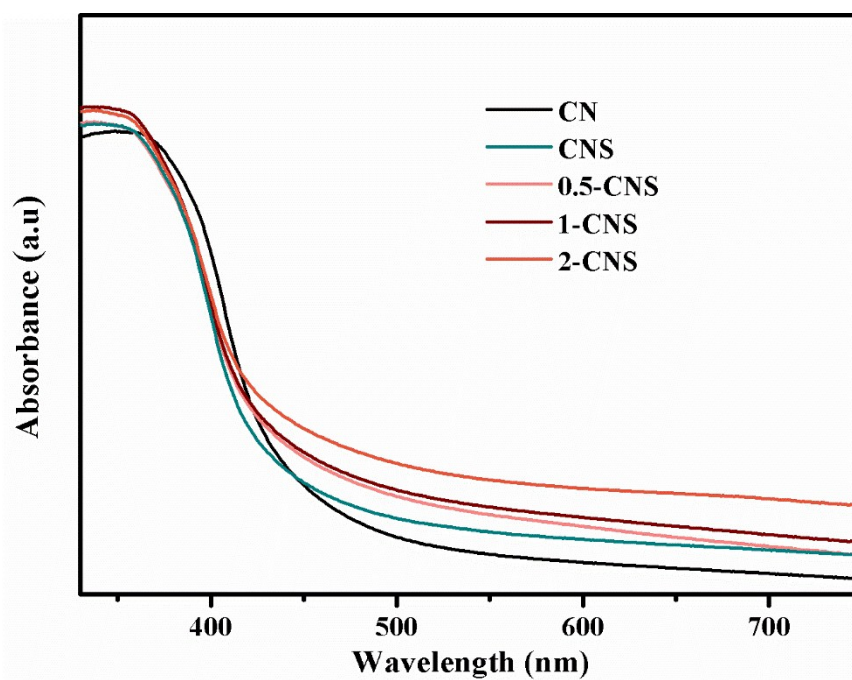

Fig. S8 UV-vis absorption spectra of CN, CNS, and different mass loading of MoO<sub>2</sub> on CNS.



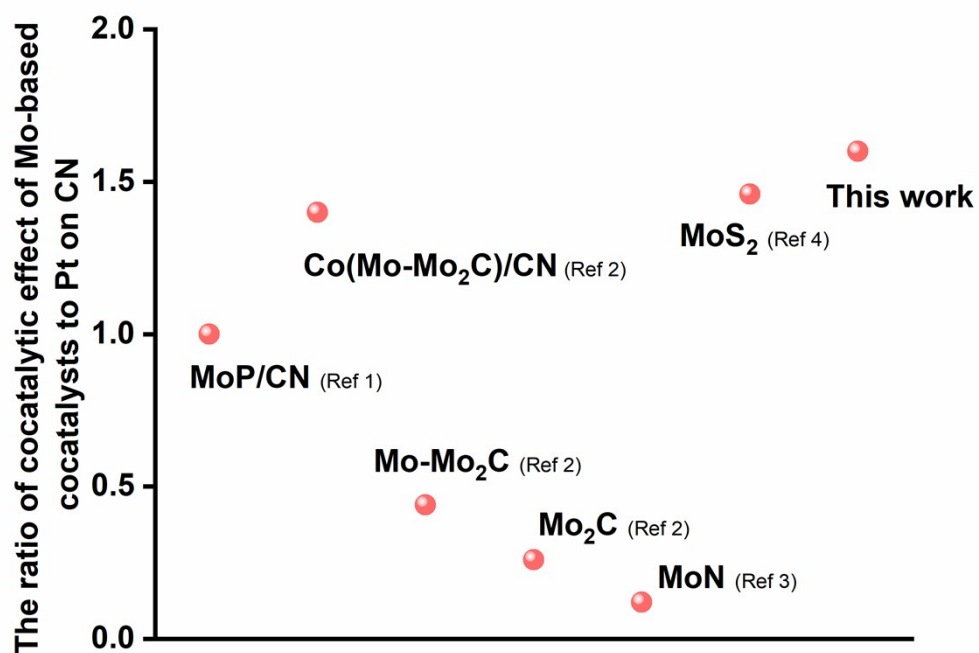

Fig. S9 The ratio of photocatalytic H<sub>2</sub> production performance of CN modified by Mo-based cocatalysts to Pt-CN.

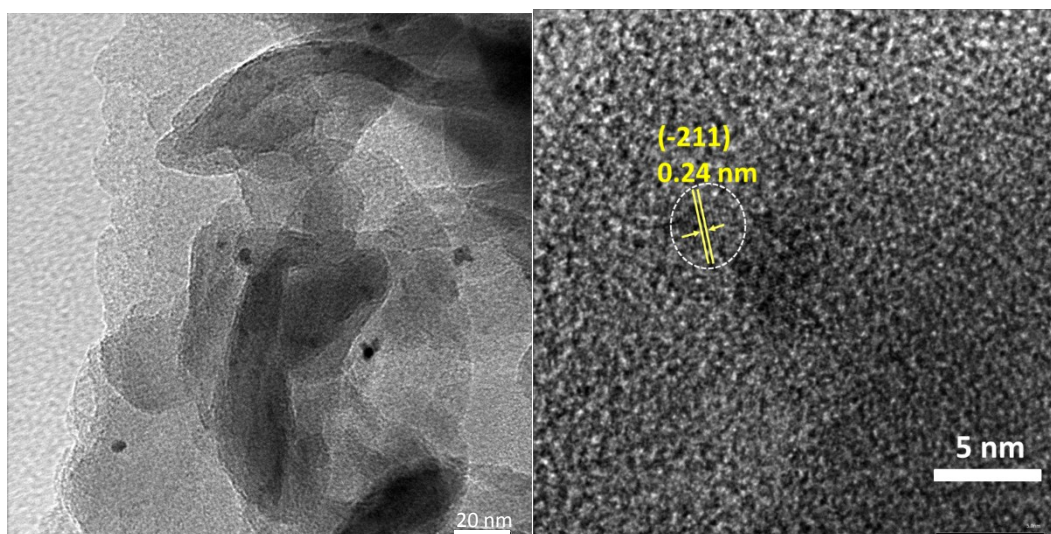

Fig. S10 TEM and HRTEM images of 1-CNS after photocatalytic H<sub>2</sub> production reaction.

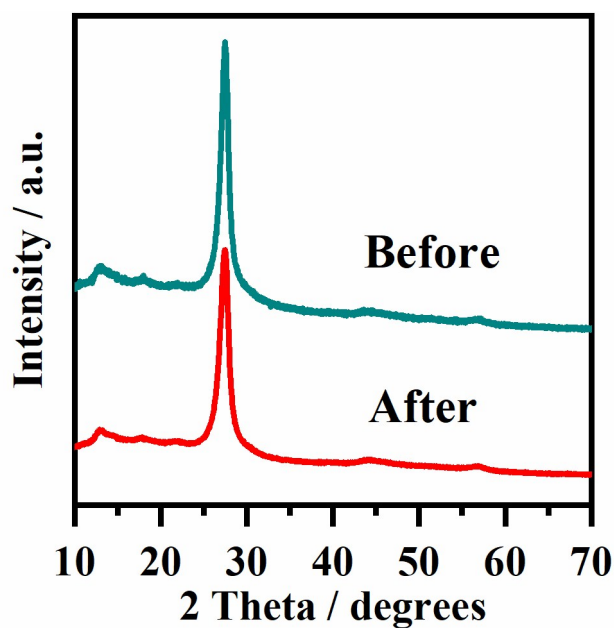

Fig. S11 XRD spectra of 1-CNS before and after photocatalytic reaction.

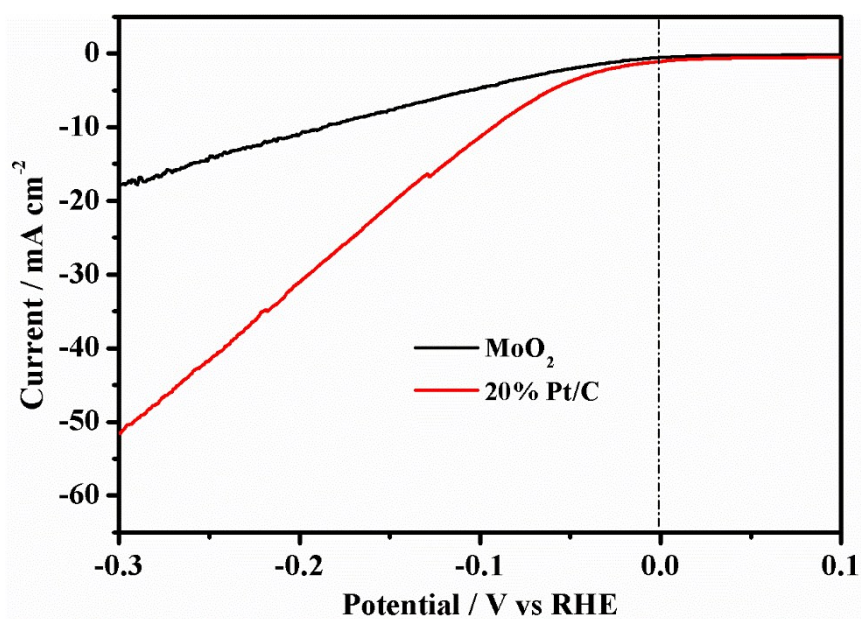

Fig. S12 LSV curves of MoO<sub>2</sub> and 20 wt% Pt/C in N<sub>2</sub>-saturated 1 M KOH solution.

## References

- [1] C. Cheng, S. Zong, J. Shia, F. Xue, Y. Zhang, et al., *Appl. Catal. B*, 2020, **265**, 118620.
- [2] Y. Zheng, J. Dong, C. Huang, L. Xia, Q. Wu, et al., *Appl. Catal. B*, 2020, **260**, 118220.

[3] K. Xia, Z. Chen, J. Yi, H. Xu, Y. Yu, et al., *Ind. Eng. Chem. Res.*, 2018, **57**, 8863-8870.

[4] Y. Yuan, Z. Shen, S. Wu, Y. Su, L. Pei, et al., *Appl. Catal. B*, 2019, **246**, 120-128.
